# Supplementary material for: Detecting past changes of effective population size
Source: PubMed Central journal article supplement (PMC4105917; doi:10.1111/eva.12170), 2014-06-16

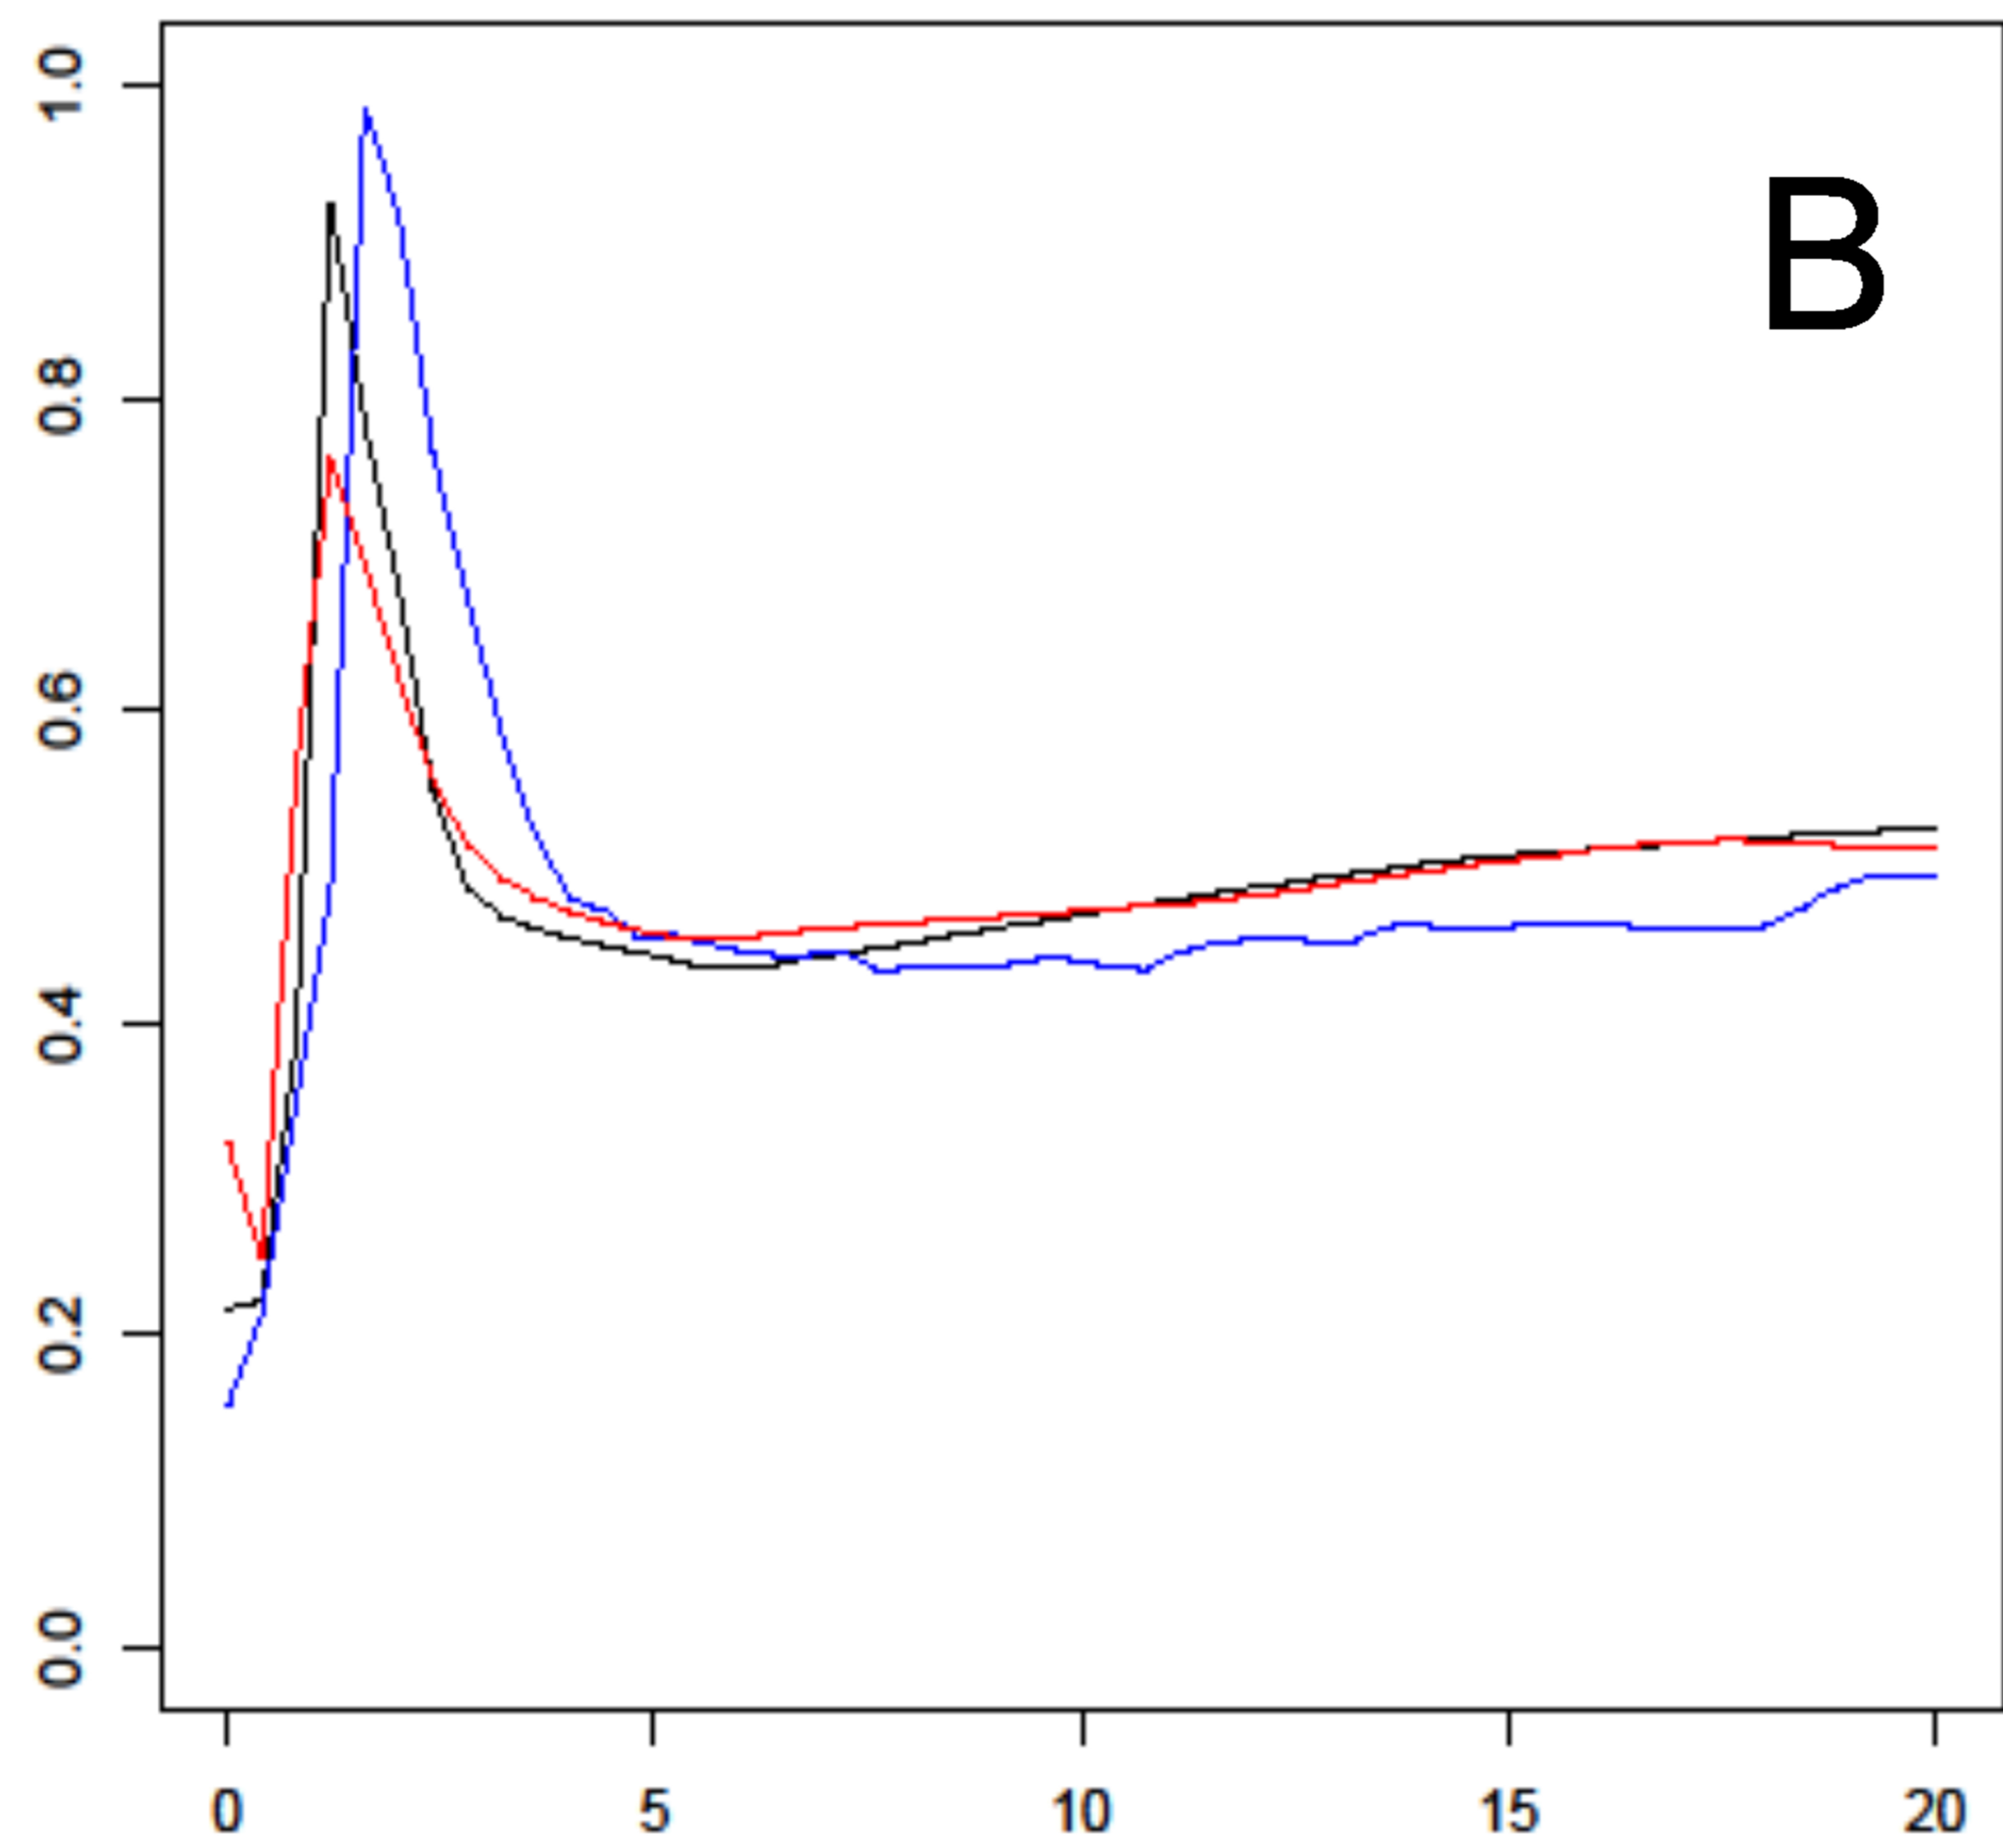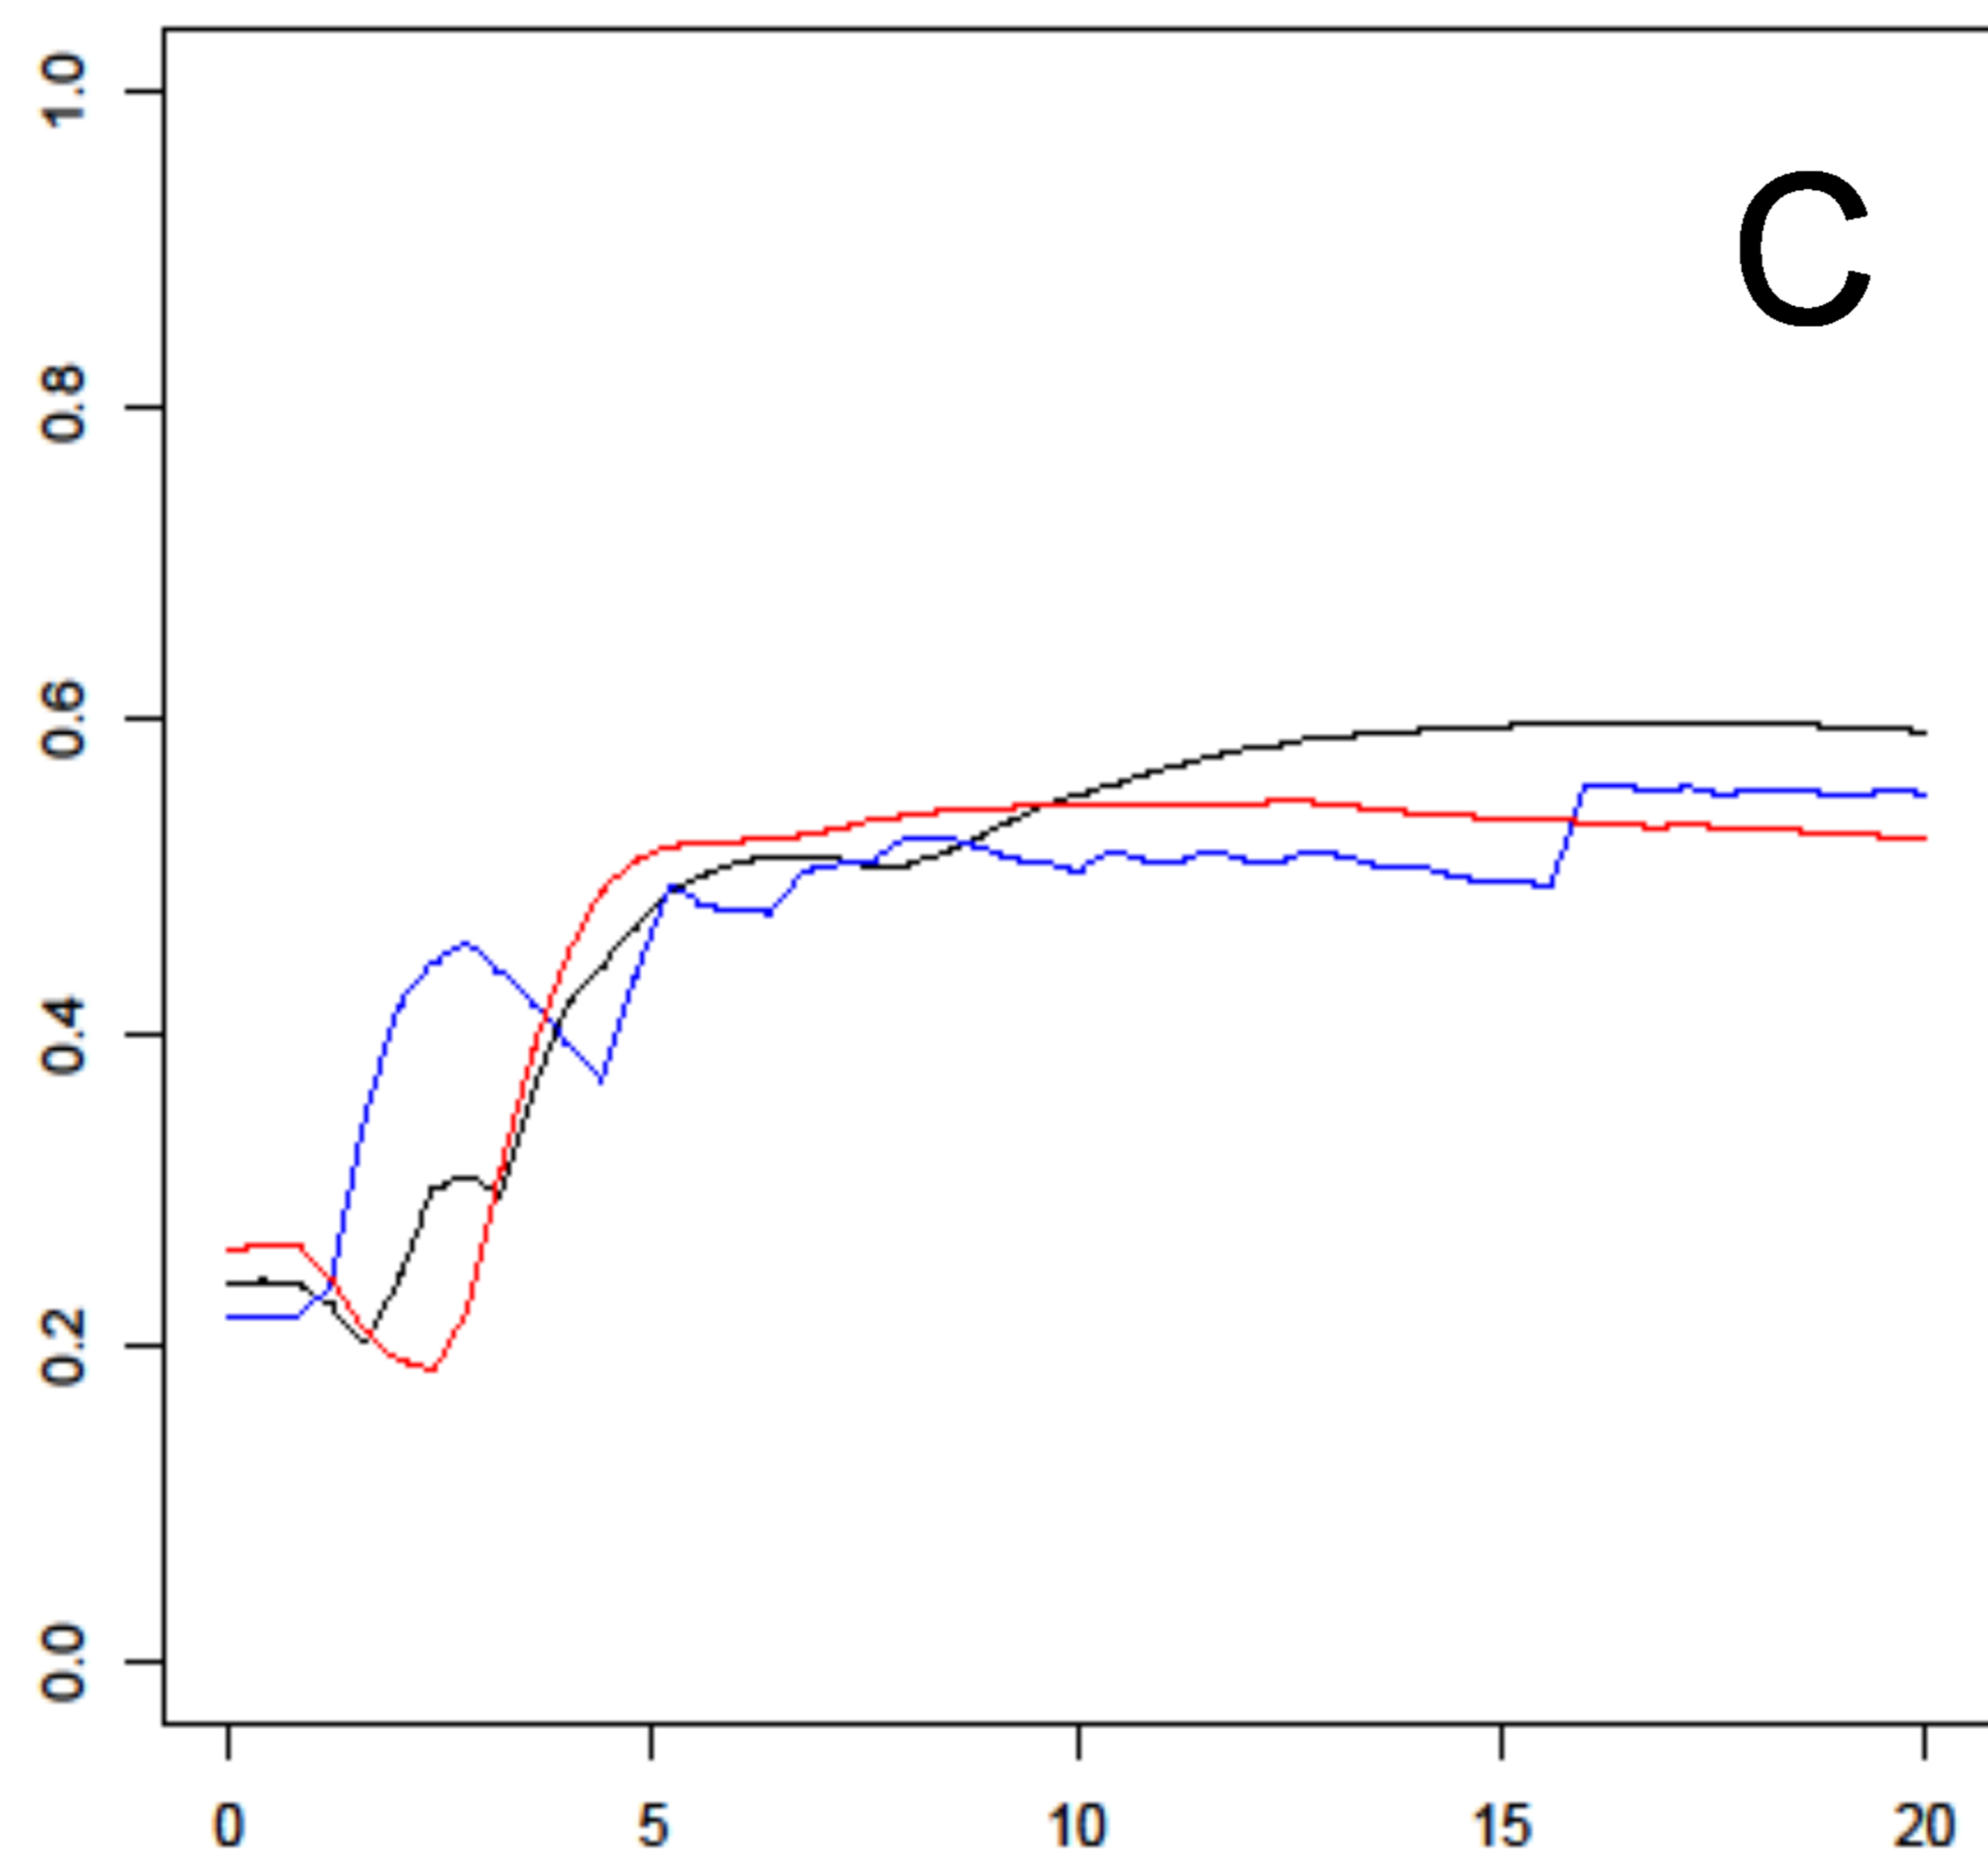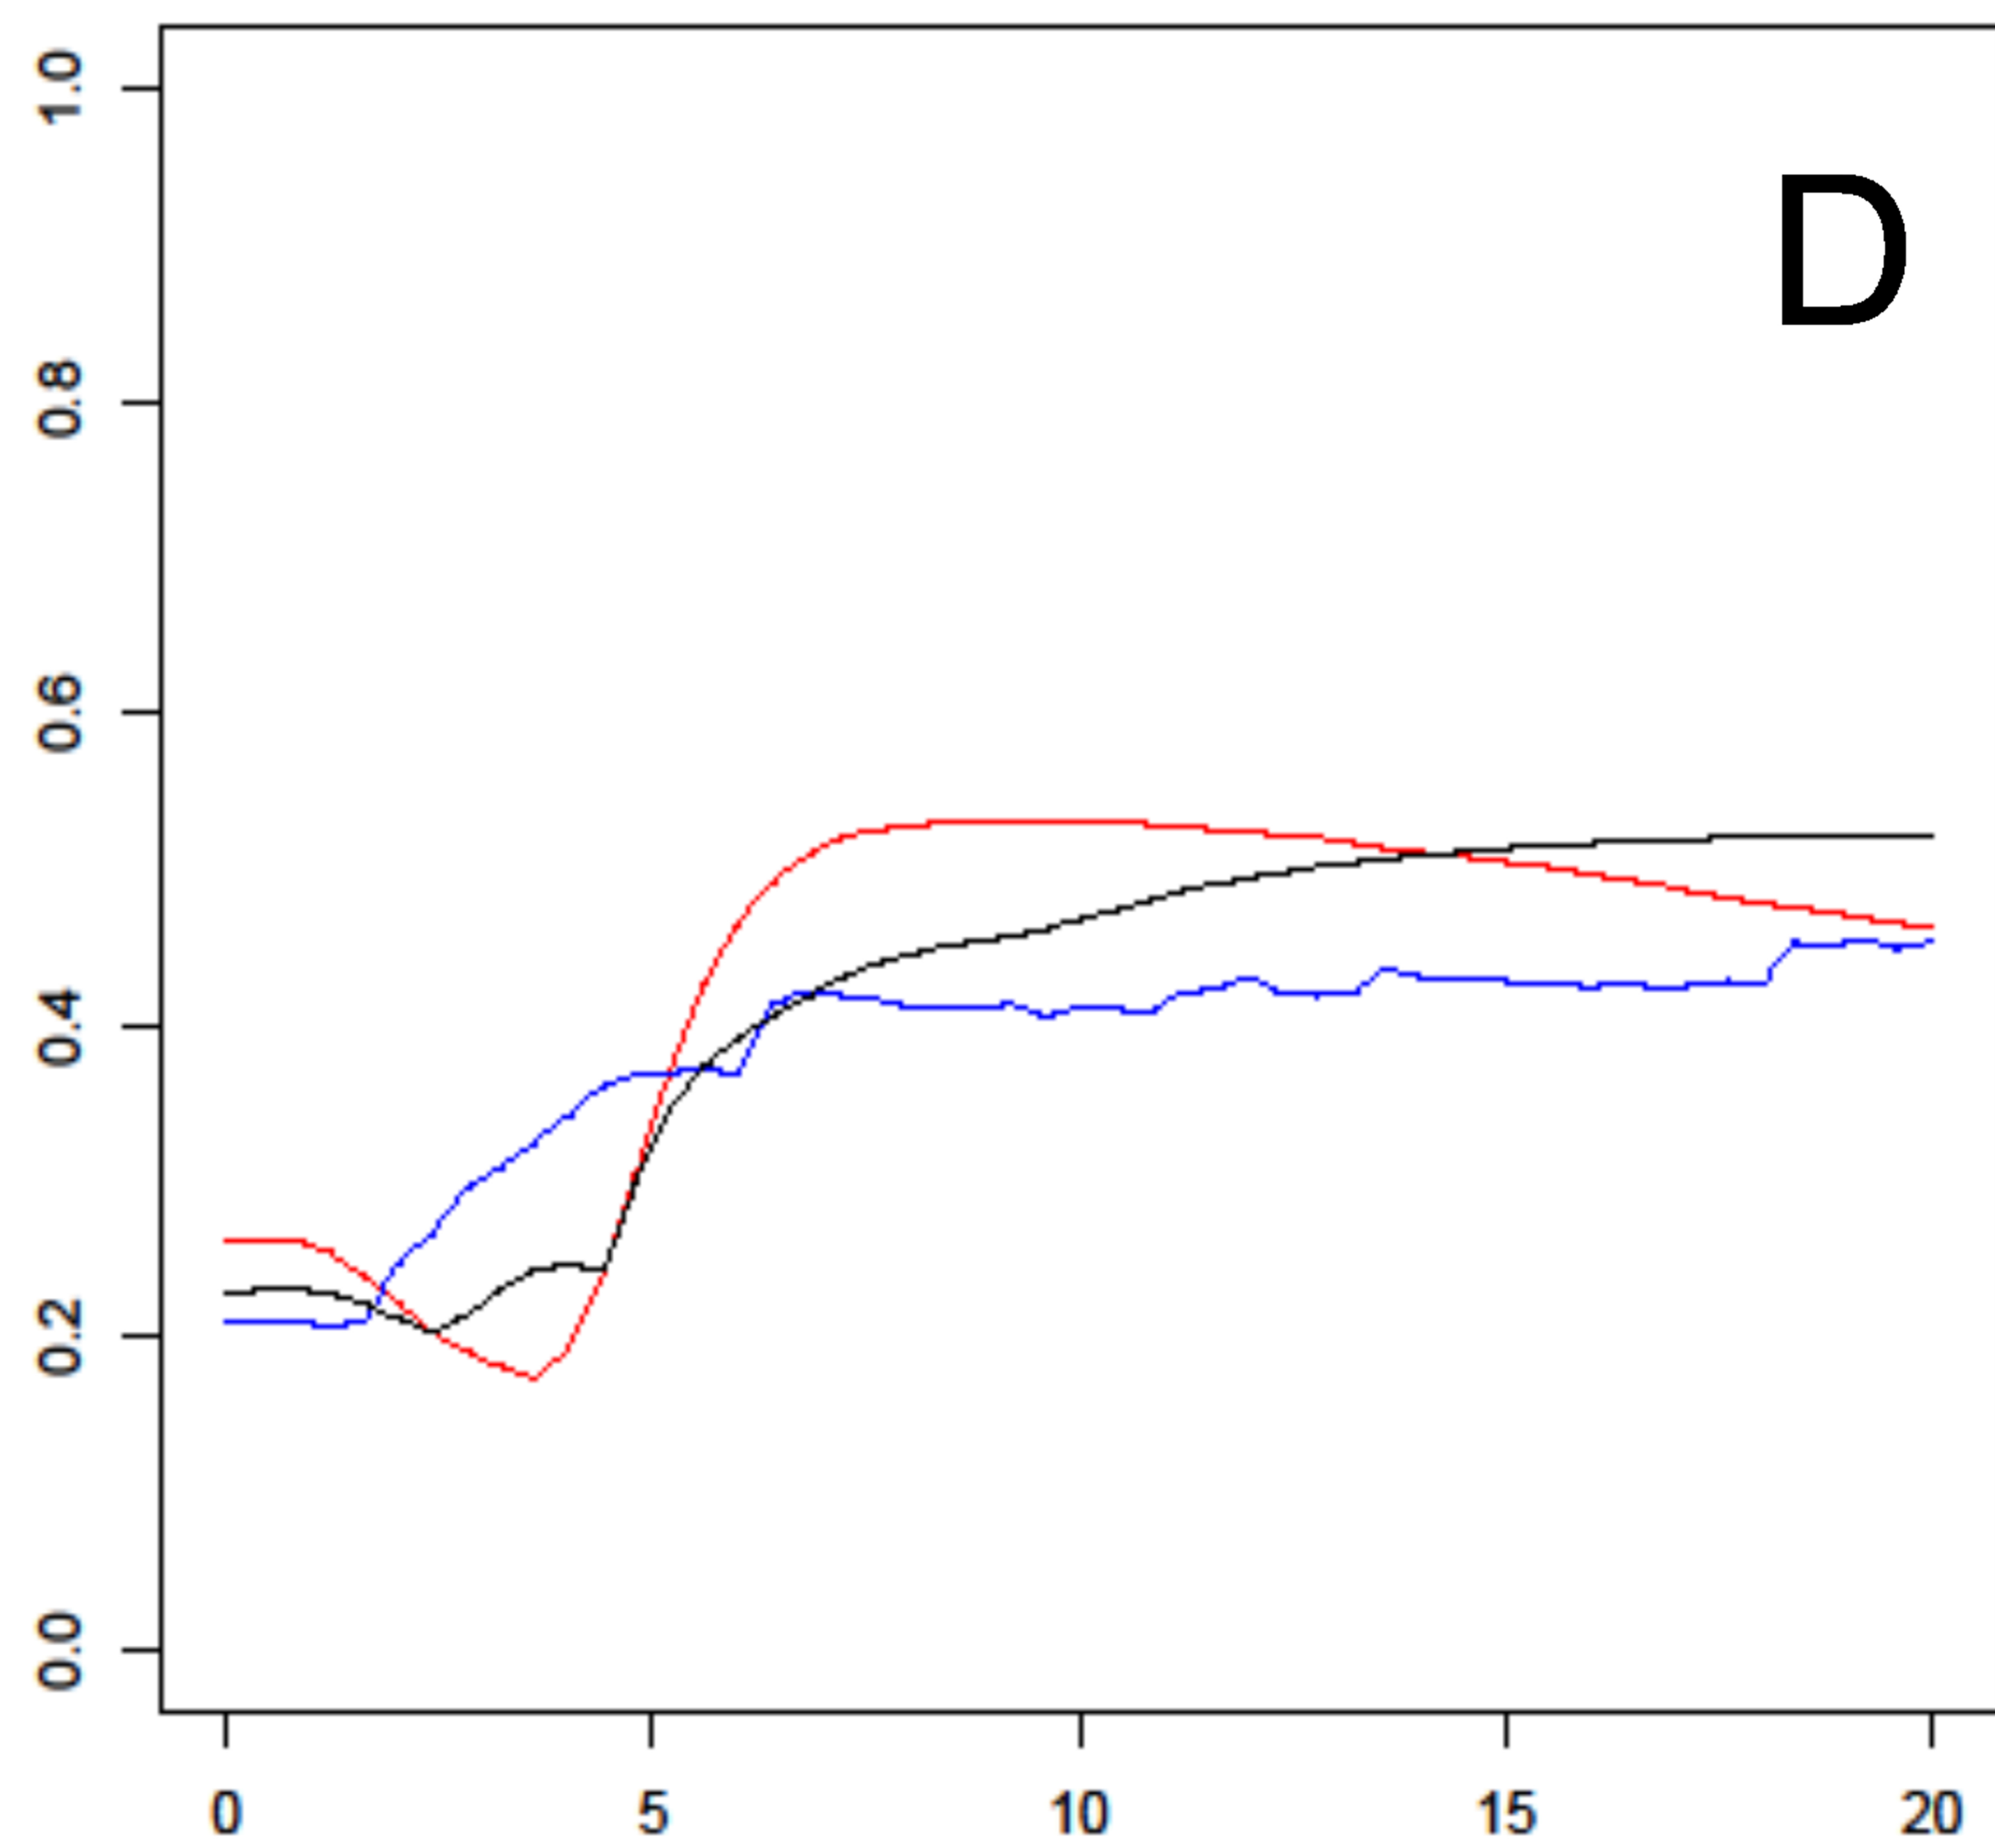

Supplement: eva0007-0663-SD4.pdf [file eva0007-0663-SD4.pdf]
